# Supplementary material for: The Oldest Gibbon Fossil (Hylobatidae) from Insular Southeast Asia: Evidence from Trinil, (East Java, Indonesia), Lower/Middle Pleistocene
Source: PLoS One. 2014 Jun 10;9(6):e99531. doi: 10.1371/journal.pone.0099531 (PMC4051846; doi:10.1371/journal.pone.0099531)
Supplement: Table S1 — Linear measurements used in this study. (XLS) [file pone.0099531.s001.xls]

## Sheet: Measurements
FAM	GEN	SP	ID	UNW	LNW	MTW	ATW	ANW	MDW	ADW	TL	NH	AGE
Gibbons	Hylobates	H.muelleri	1880_1167_D	7.11	7.74	10.99	9.26	8.16	9.42	9.59	188.31	10.37	A
Gibbons	Hylobates	H.muelleri	1880_1167_G	6.12	8.53	11.3	9.29	8.54	9.5	9.42	187.5	10.13	A
Gibbons	Hylobates	H.muelleri	1880_1170_D	6.18	9.72	10.81	8.91	7.69	8.05	8.78	177.24	8.94	A
Gibbons	Hylobates	H.muelleri	1880_1170_G	6.44	10.09	10.68	8.96	9.07	8.05	8.69	177.59	9.29	A
Gibbons	Hylobates	H.muelleri	1901_102_D	6.31	11.69	15.19	11.79	9.26	11.83	11.6	206.69	11.49	A
Gibbons	Hylobates	H.muelleri	1901_102_G	7.14	11.13	14.93	11.68	9.06	11.76	11.3	205.32	11.49	A
Gibbons	Hylobates	H.muelleri	1901-101	6.86	10.61	14.29	10.31	8.08	11.70	10.76	203.51	10.45	A
Gibbons	Hylobates	H.muelleri	1880-1171	7	10.51	12.74	10.97	9.16	11.12	10.81	205.26	13.22	A
Gibbons	Hylobates	H.muelleri	1897_1297_D	6.86	11.63	12.09	10.71	8.36	9.44	10.55	205.77	10.73	A
Gibbons	Hylobates	H.muelleri	1897_1298_G	4.81	13.38	13.78	11.55	8.79	10.05	12.00	203.52	10.78	A
Gibbons	Hylobates	H.lar	1990_433_D	7.05	11.67	14.81	11.57	9.97	11.33	11.35	NA	11	A
Gibbons	Hylobates	H.lar	1963_1372_D	9.79	12.51	12.31	10.71	8.63	10.38	10.85	NA	NA	A
Gibbons	Hylobates	H.lar	1961_287_D	9.52	12.62	15.16	12.89	11.28	10.43	12.26	221.12	12.75	A
Gibbons	Hylobates	H.lar	1961_287_G	9.27	12.14	12.25	11.87	10.87	10.5	12.38	220.47	12.55	A
Gibbons	Hylobates	H.lar	A3856_D	6.17	9.47	13.6	11.86	10.32	12.02	11.75	198.51	11.38	A
Gibbons	Hylobates	H.lar	A3856_G	4.97	9.13	13.88	11.92	9.63	11.58	11.63	197.54	10.43	A
Gibbons	Hylobates	H.moloch	1976_328_D	7.16	12.91	14.18	12.29	11.66	10.66	11.83	206.42	13.21	A
Gibbons	Hylobates	H.moloch	1976_328_G	8.36	12.92	13.72	11.87	11.59	10.80	11.56	206.4	12.91	A
Gibbons	Hylobates	H.moloch	1869_426_D	5.33	8.01	10.25	8.33	7.34	7.39	7.65	145.72	8.81	J
Gibbons	Hylobates	H.moloch	1869_426_G	6.09	7.33	10.25	8.5	7.35	7.11	7.66	NA	8.94	J
Gibbons	Hylobates	H.moloch	1960_170_D	8.6	12.91	12.59	10.75	10.29	9.78	10.81	219.98	12.37	Sa
Gibbons	Hylobates	H.moloch	1880_1169_D	6.81	11.39	12.62	10.2	7.41	10.00	10.00	192.97	9.79	Sa
Gibbons	Hylobates	H.moloch	1880_1169_G	6.95	11.86	11.65	9.89	7.69	9.51	9.86	191.92	9.73	A
Gibbons	Nomascus	N.gabriellae	1964_1616_D	5.52	8.15	11.08	8.97	8.27	8.04	8.73	146.23	9.13	Sa
Gibbons	Nomascus	N.gabriellae	1962_42_D	4.61	10.88	13.77	9.54	9.04	10.63	10.18	197.06	10.43	A
Gibbons	Nomascus	N.gabriellae	1962_42_G	5.19	11.81	13.21	10.52	9.05	10.52	10.46	195.85	10.91	A
Gibbons	Nomascus	N.concolor	1971_81_D	6.60	10.82	11.81	9.97	8.31	8.06	9.19	NA	NA	Sa
Gibbons	Nomascus	N.concolor	1944-47D	NA	10.12	14.28	10.13	9.34	10.25	10.39	190	12.02	A
Gibbons	Nomascus	N.concolor	1944-47G	NA	10.24	14.25	10.49	9.94	10.36	10.38	190	11.48	A
Gibbons	Nomascus	N.leucogenys	1991_1420_G	7.49	13.64	14.22	12.09	9.77	11.08	11.01	197.46	11.92	A
Gibbons	Nomascus	N.leucogenys	1956_152_D	4.34	10.08	14.23	10.26	8.96	9.38	10.48	186.58	10.93	N
Gibbons	Nomascus	N.leucogenys	1956_152_G	4.00	11.31	13.64	10.25	8.82	9.66	10.3	185.77	10.96	N
Gibbons	Nomascus	N.leucogenys	1980_32_D	7.27	9.76	12.83	10.46	8.83	10.00	9.44	174.21	10.28	N
Gibbons	Nomascus	N.leucogenys	1980_32_G	6.07	10.08	12.18	10.17	8.77	10.32	9.48	174.08	10.07	N
Gibbons	Nomascus	N.leucogenys	1835_72_D	6.41	7.84	12.38	9.45	8.31	8.78	10.04	187.03	10.6	A
Gibbons	Nomascus	N.leucogenys	1835_72_G	5.12	8.38	11.96	9.24	8.57	9.08	9.65	190.68	10.98	A
Gibbons	Nomascus	N.leucogenys	1937_252_D	4.43	6.68	10.6	8.72	7.78	7.54	7.26	NA	NA	J
Gibbons	Nomascus	N.leucogenys	1937_252_G	3.95	8.47	10.27	8.42	8.31	7.59	7.82	NA	NA	J
Gibbons	Nomascus	N.leucogenys	1956_7_G	5.6	9.31	13.98	10.26	9.86	10.3	11.11	NA	NA	A
Gibbons	Nomascus	N.leucogenys	1934_584_D	4.49	7.92	10.26	8.09	6.5	7.33	6.93	147.39	8.74	J
Gibbons	Nomascus	N.leucogenys	1934_584_G	4.86	8.11	10.11	7.95	6.73	7.56	7.02	147.81	8.57	J
Gibbons	Nomascus	N.leucogenys	2000_403_D	6.38	14.44	13.51	11.49	10.93	11.61	10.55	191.97	11.91	A
Gibbons	Nomascus	N.leucogenys	2000_403_G	5.61	14.83	14.08	10.89	10.75	10.75	9.85	193.25	12.48	A
Gibbons	Nomascus	N.leucogenys	1948_95_D	7.57	11.97	14.77	12.39	9.71	10.12	12.48	196.08	13.35	A
Gibbons	Nomascus	N.leucogenys	1954_14_D	4.88	9.98	11.2	8.74	7.72	7.81	9.00	172.79	10.86	Sa
Gibbons	Nomascus	N.leucogenys	1954_14_G	4.63	11.14	11.27	8.93	7.85	7.93	8.66	NA	10.22	Sa
Gibbons	Symphalangus	S.syndactilus	1885_381_G	7.29	15.02	15.03	13.15	11.14	11.91	12.57	220.17	12.61	A
Gibbons	Bunopithecus	B.hoolock	1872_307_D	5.33	8.67	11.94	9.81	7.78	8.7	8.66	NA	NA	Sa
Gibbons	Bunopithecus	B.hoolock	1872_307_G	6.35	9.72	11.94	8.73	7.56	8.61	8.41	NA	NA	Sa
Langurs	Presbytis	P.chrysomelas	1897_1306_D	1.94	6.12	9.54	8.89	7.43	7.58	8.28	NA	NA	Sa
Langurs	Presbytis	P.chrysomelas	1897_1306_G	1.86	7.00	8.87	8.7	7.33	7.65	8.6	NA	NA	Sa
Langurs	Presbytis	P.chrysomelas	1897_1307_D	3.66	4.46	7.92	8.26	7.12	6.38	7.08	NA	NA	N
Langurs	Presbytis	P.chrysomelas	1897_1307_G	3.17	5.84	7.78	7.7	7.4	6.35	6.99	NA	NA	N
Langurs	Presbytis	P.rubicunda	1897_1312_D	5.05	8.6	11.81	10.64	9.46	9.9	10.37	NA	NA	A
Langurs	Presbytis	P.rubicunda	1897_1312_G	5.78	11.06	11.05	10.9	9.44	9.87	10.07	NA	NA	A
Langurs	Presbytis	P.hosei	1897_1310_D	4.89	7.74	12.65	10.84	9.06	10.03	10.51	NA	NA	A
Langurs	Presbytis	P.hosei	1897_1310_G	4.35	6.41	12.45	10.85	9.13	9.95	10.23	NA	NA	A
Odd_nosed	Pygathrix	P.naemeus	1880_1152	6.88	14.34	14.57	14.53	10.68	13.50	12.52	NA	NA	A
Odd_nosed	Nasalis	N.larvatus	1897_1301_D	6.99	11.4	14.41	14.4	13.65	12.45	13.27	216.97	16.87	A
Odd_nosed	Nasalis	N.larvatus	1897_1301_G	6.43	11.28	14.8	14.33	13.54	12.41	13.08	218.88	15.97	A
Odd_nosed	Nasalis	N.larvatus	1901_766_D	8.95	13.36	17.33	17.19	17.58	15.14	15.91	248.97	20.54	A
Odd_nosed	Nasalis	N.larvatus	1901_766_G	8.76	14.44	16.73	17.65	17.66	14.72	15.06	249.64	19.66	A
Odd_nosed	Nasalis	N.larvatus	1897_1302_G	6.00	11.18	13.1	14.15	12.38	12.35	13.35	NA	NA	A
Langurs	Trachypithecus	T.johnii	A3859_D	7.3	10.93	13.88	13.38	10.90	11.32	12.78	220.82	13.86	A
Langurs	Trachypithecus	T.johnii	A3859_G	5.7	11.15	13.37	13.77	10.2	11.89	12.13	217.72	13.86	A
Langurs	Trachypithecus	T.phayrei	1934_238_D	4.95	7.74	13.77	12.65	8.58	10.57	10.38	193.86	12.47	A
Langurs	Trachypithecus	T.phayrei	1934_238_G	5.32	8.75	13.38	12.44	9.2	10.42	10.96	193.51	12.05	A
Langurs	Trachypithecus	T.cristatus	1877_18_D	5.61	10.42	13.49	12.55	10.58	11.01	11.11	175.56	14.26	A
Langurs	Trachypithecus	T.cristatus	1877_18_G	5.53	9.3	12.88	12.42	10.12	11.14	11.13	176.52	13.12	A
Langurs	Trachypithecus	T.auratus	1880_1146_D	5.95	12.05	14.52	13.68	12.47	11.61	12.02	217.24	15.64	A
Langurs	Trachypithecus	T.auratus	1880_1146_G	8.00	13.96	13.76	13.15	14.32	11.46	12.38	216.83	15.17	A
Langurs	Trachypithecus	T.auratus	1880_1151_D	5.71	8.16	11.44	11.23	8.73	9.89	10.29	177.12	11.65	A
Langurs	Trachypithecus	T.auratus	1880_1151_G	5.99	10.28	11.84	11.09	9.03	10.18	10.4	179.14	11.01	A
Cercopithecid	Macaca	M.fascicularis	A3879_D	5.2	10.75	11.46	10.54	8.54	9.28	9.21	131.22	10.01	A
Cercopithecid	Macaca	M.fascicularis	A3879_G	5.43	9.52	10.79	9.96	9	9.26	9.26	129.89	10.20	A
Cercopithecid	Macaca	M.fascicularis	1889-435_D	4.9	7.46	8.76	7.8	6.37	7.63	7.93	NA	NA	A
Cercopithecid	Macaca	M.fascicularis	1889_435_G	4.46	7.68	8.71	7.61	6.3	7.74	8.09	NA	NA	A
Cercopithecid	Macaca	M.fascicularis	1890_3811_D	3.95	6.94	8.55	9.09	7.56	7.29	8.44	117.54	8.67	A
Cercopithecid	Macaca	M.fascicularis	1890_3811_G	4.03	6.77	8.72	9.28	8.12	7.47	8.59	117.4	8.67	A
Cercopithecid	Macaca	M.fascicularis	2009_385_D	7.07	10.68	11.61	10.58	10.64	9.44	10.59	160.82	12.28	A
Cercopithecid	Macaca	M.fascicularis	2009_385_G	6.77	10.29	11.58	10.69	10.08	10.38	11.63	160.53	11.71	A
Cercopithecid	Macaca	M.fascicularis	1890_3811bis_D	3.87	6.51	8.31	8.19	7.08	7.24	7.68	NA	NA	A
Cercopithecid	Macaca	M.fascicularis	1890_3811bis_G	4.2	7.17	8.51	8.44	7.22	7.3	8.01	NA	NA	A
Cercopithecid	Macaca	M.fascicularis	1995_247_D	8.65	10.03	14.42	11.76	12.13	11.82	12.5	197.29	15.17	A
Cercopithecid	Macaca	M.fascicularis	2009_387_D	4.96	7.78	8.93	8.59	7.56	7.46	7.3	118.18	9.31	A
Cercopithecid	Macaca	M.fascicularis	2009_387_G	4.42	8.74	8.53	8.09	7.5	7.61	7.95	118.82	9.90	A
Cercopithecid	Macaca	M.fascicularis	A3886_D	5.16	9.8	12.4	10.55	10.21	9.93	10.53	154.53	11.86	A
Cercopithecid	Macaca	M.fascicularis	A3886_G	5.43	10.23	11.59	10.83	10.69	9.89	10.83	154.25	12.39	A
Cercopithecid	Macaca	M.fascicularis	1890_57_D	5.62	7.37	9.25	8.61	8.05	8.78	8.28	NA	NA	A
Cercopithecid	Macaca	M.fascicularis	1890_57_G	6.19	7.97	8.8	8.37	7.57	8.48	8.37	NA	NA	A
Cercopithecid	Macaca	M.nemestrina	1917_41_D	7.58	12.15	12.07	12.3	11.27	11.01	11.76	159.89	11.13	A
Cercopithecid	Macaca	M.nemestrina	1917_41_G	7.64	13.19	11.18	13.1	10.11	11.15	11.42	158.48	11.01	A
Cercopithecid	Macaca	M.nemestrina	A3896_D	11.66	13.37	15.85	13.99	10.63	13.96	13.95	207.66	14.12	A
Cercopithecid	Macaca	M.nemestrina	A3896_G	11.34	12.78	14.72	14.05	10.56	14.28	13.8	209.35	14.42	A
Cercopithecid	Macaca	M.nemestrina	A3883_D	8.37	10.94	13.28	12.94	11.28	13.37	12.7	188.78	12.49	A
Cercopithecid	Macaca	M.nemestrina	A3883_G	7.96	10.14	12.7	12.2	12.98	12.17	12.94	189.23	12.94	A
Cercopithecid	Macaca	M.nemestrina	1963_1385_G	9.35	10.66	13.14	12.2	10.94	11.34	12.51	170.72	13.10	A
Cercopithecid	Macaca	M.nemestrina	1929_197_D	7.83	8.85	11.09	10.87	8.82	10.48	10.27	157.97	10.81	A
Cercopithecid	Macaca	M.nemestrina	1929_197_G	8.41	7.47	11.22	10.88	9.64	10.51	10.53	157.39	10.68	A
Cercopithecid	Macaca	M.nemestrina	1893_483_D	3.13	7.57	12.27	10.5	9.05	9.9	11.08	NA	NA	Sa
Cercopithecid	Macaca	M.nemestrina	1893_483_G	3.65	NA	12.35	10.62	9.35	9.55	10.91	NA	NA	Sa
Trinil	Fossil	Hylobates	5703	10.44	9.93	11.15	9.97	7.53	7.53	7.18	NA	9.86	NA
